# Supplementary material
Source: MDPI journal article supplement (https://www.mdpi.com/2076-3417/11/9/3789)
Supplement: s1 [file s1]

## Supplementary

# Development and validation of a UHPLC-qTOF MS method for the determination of sorbitol-based nuclear clarifying agents in food simulants after migration from food contact materials

Emmanouil D. Tsochatzis<sup>1\*</sup>, Joao Alberto Lopes<sup>2</sup>, Georgios Theodoridis<sup>3,4,5</sup>, Helen Gika<sup>3,4,6</sup>

<sup>1</sup> Department of Food Science, Centre of Innovative Food Research (iFood), Aarhus University, Agro Food Park 48, 8200 Aarhus N, Denmark.;

<sup>2</sup> European Commission, Joint Research Centre, Geel, Belgium;

<sup>3</sup> FoodOmicsGR Research Infrastructure, AUTH Node, Center for Interdisciplinary Research and Innovation (CIRI-AUTH), Balkan Center B1.4, 10<sup>th</sup> Km Thessaloniki-Thermi Rd, P.O. Box 8318, GR 57001 Thessaloniki, Greece;

<sup>4</sup> Biomic AUTH, Center for Interdisciplinary Research and Innovation (CIRI-AUTH), Balkan Center B1.4, 10th Km Thessaloniki-Thermi Rd, P.O. Box 8318, GR 57001, Thessaloniki, Greece;

<sup>5</sup> Department of Chemistry, Aristotle University of Thessaloniki, 54124, Thessaloniki, Greece;

<sup>6</sup> Department of Medicine, Aristotle University of Thessaloniki, 54124, Thessaloniki, Greece;

\* Correspondence: Emmanouil.tsochatzis@food.au.dk; Tel.: +4541893130 (E.T).

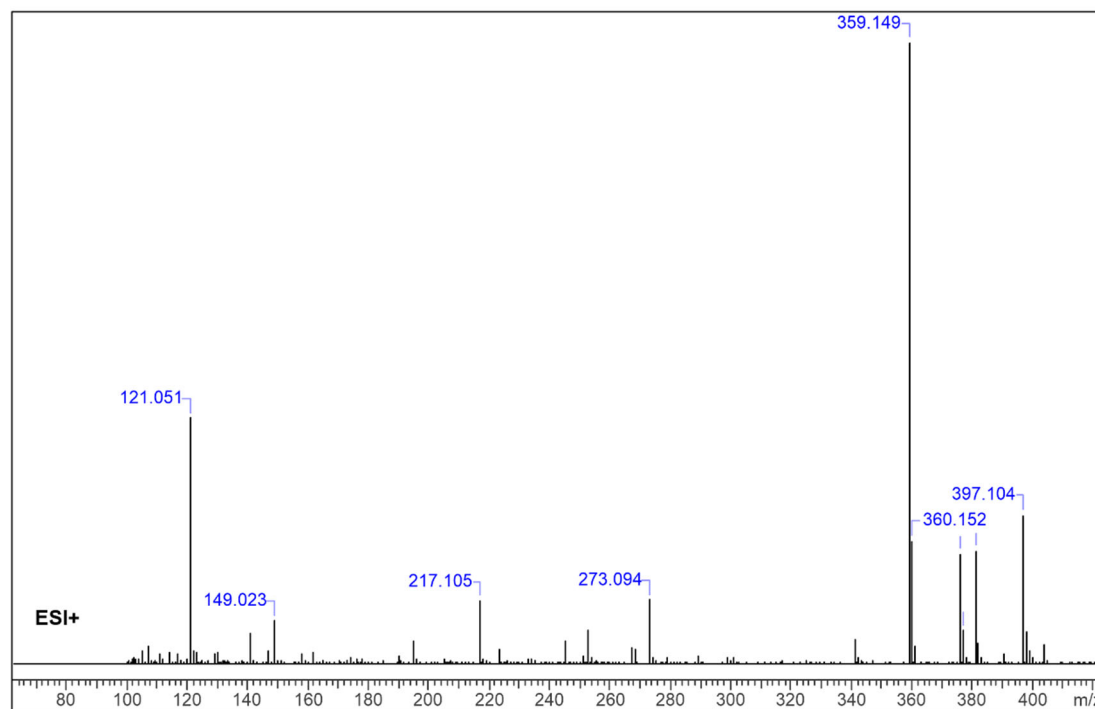

**Figure S1.** HR-QTOF MS of dibenzylidene sorbitol (DBS; FCM 674).

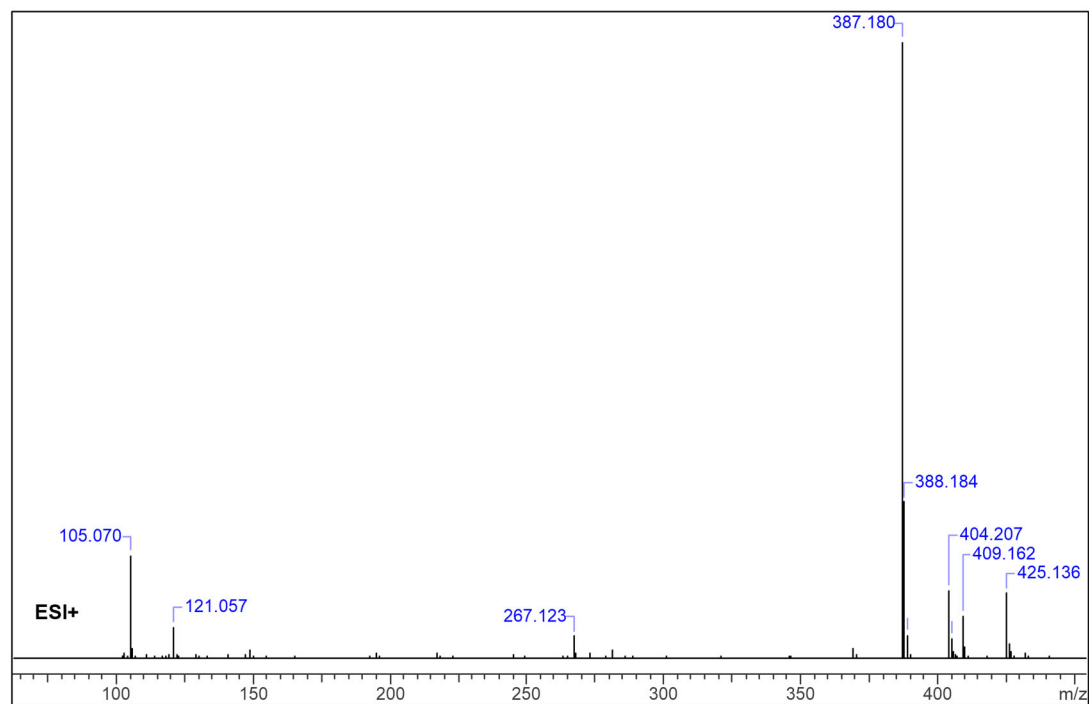

**Figure S2.** HR-QTOF MS of bis(methylbenzylidene)sorbitol (DMBS; FCM 752).

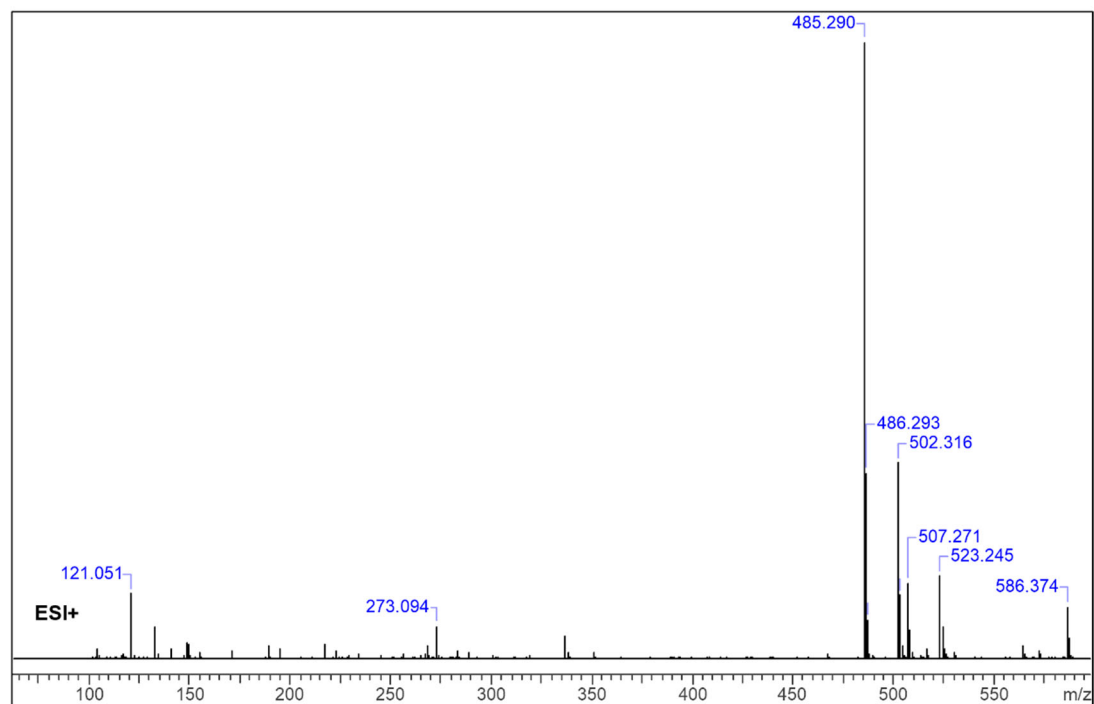

**Figure S3.** HR-QTOF MS of bis(4-propylbenzylidene) propylsorbitol (PBPS; FCM 808).

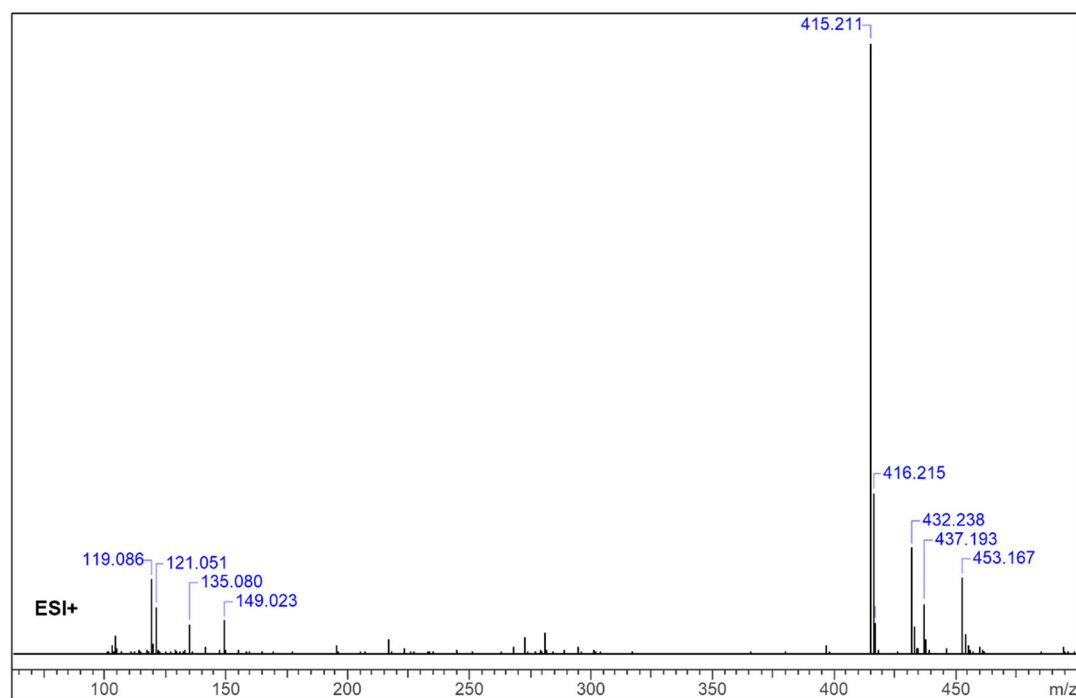

**Figure S4.** HR-QTOF MS of bis(3,4-dimethylbenzylidene) sorbitol (DMBS; FCM 766).
